# Supplementary material
Source: PubMed Central journal article supplement (PMC2633850)
Supplement: pp.108.131003_1.pdf [file pp.108.131003_1.pdf]

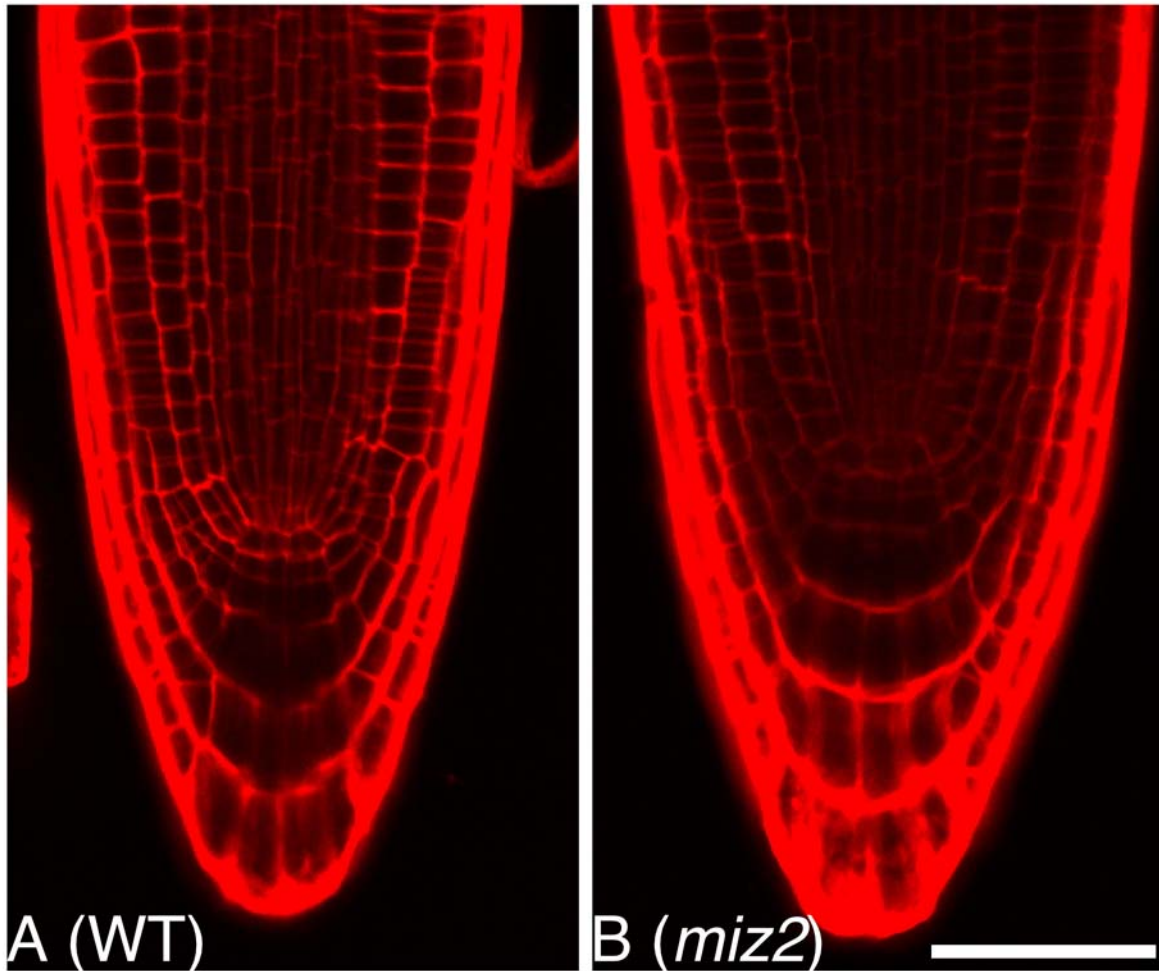

**Supplemental Figure S1.** Primary root meristem of *miz2* mutant. Four-day-old seedlings of WT (A) and *miz2* (B) were stained with propidium iodide and observed under a confocal laser-scanning microscope. Scale bar, 50  $\mu\text{m}$ .
