# Supplementary material
Source: PubMed Central journal article supplement (PMC2633850)
Supplement: pp.108.131003_2.pdf [file pp.108.131003_2.pdf]

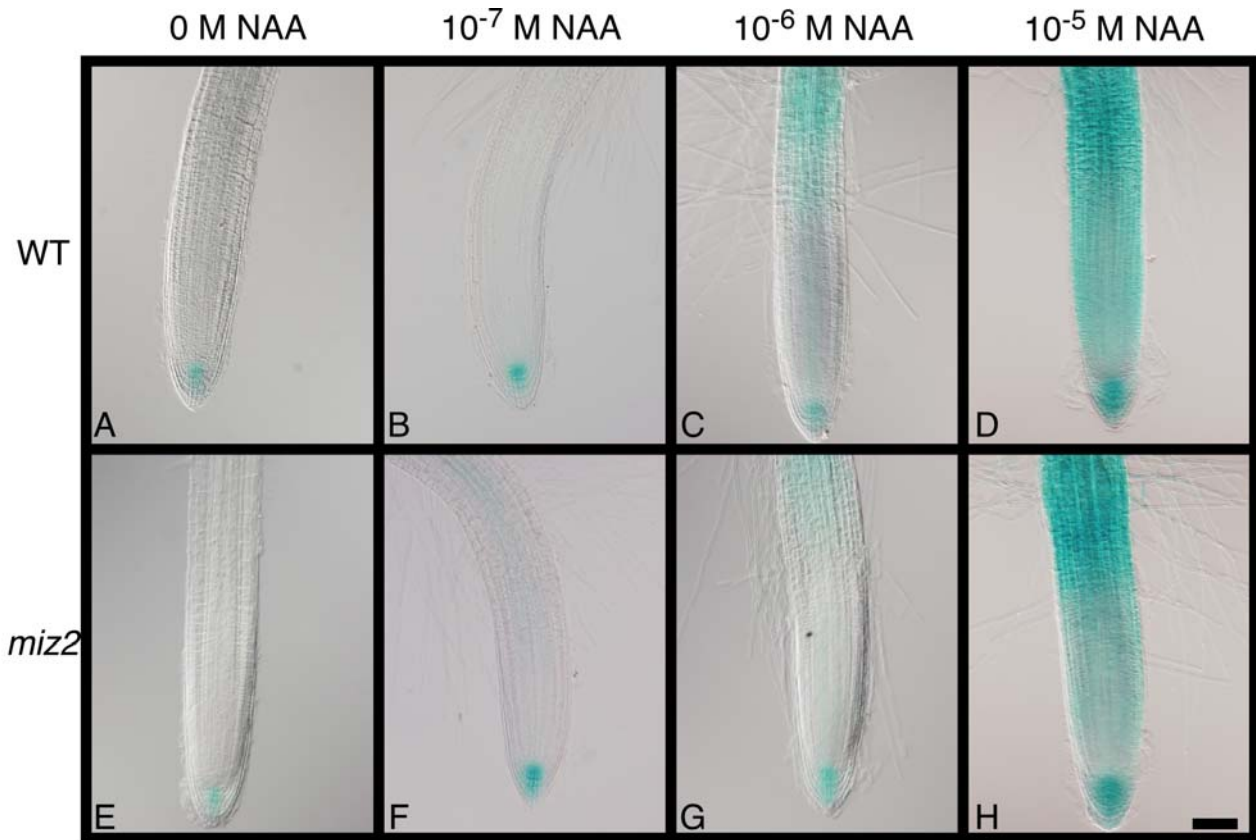

**Supplemental Figure S2.** Auxin response gradients in *miz2* root tips upon exogenous auxin treatment. Fourteen-day-old seedlings were cultured for 24 h in liquid 1/2 MS medium containing various concentrations of naphthaleneacetic acid (NAA). For control cultures, an equivalent volume of dimethylsulfoxide was added to the medium. *DR5::GUS* signals in wild type (A-D), and *miz2* (E-H) are shown. Scale bar, 100  $\mu$ m.
